# Supplementary material for: EGFR and PI3K/m-TOR inhibitors: design, microwave assisted synthesis and anticancer activity of thiazole–coumarin hybrids
Source: Royal Society of Chemistry journal article supplement (doi:10.1039/d3ra03483f), 2023-01-01
Supplement: d3ra03483f1.pdf [file d3ra03483f1.pdf]

**Supporting information**

**EGFR and PI3K /m-TOR inhibitors: Design, microwave assisted synthesis and anticancer activity of thiazole-coumarin hybrids**

Rasha Z. Batran<sup>1</sup>, Eman Y. Ahmed<sup>1,\*</sup>, Hanem M. Awad<sup>2</sup>, Korany A. Ali<sup>3</sup>,

Nehad A. Abdel Latif<sup>1,\*</sup>

<sup>1</sup>Chemistry of Natural Compounds Department, Pharmaceutical and Drug Industries Research Institute, National Research Centre, Dokki, Cairo, 12622, Egypt.

<sup>2</sup> Tanning Materials and Leather Technology Department, National Research Centre, Dokki, Cairo, 12622, Egypt.

<sup>3</sup> Applied Organic Chemistry Department, Advanced Materials and Nanotechnology Group, National Research Centre, Dokki, Cairo, 12622, Egypt

\* Correspondence: [eyam\\_ha@yahoo.com](mailto:eyam_ha@yahoo.com)

[nehad\\_km@yahoo.com](mailto:nehad_km@yahoo.com)

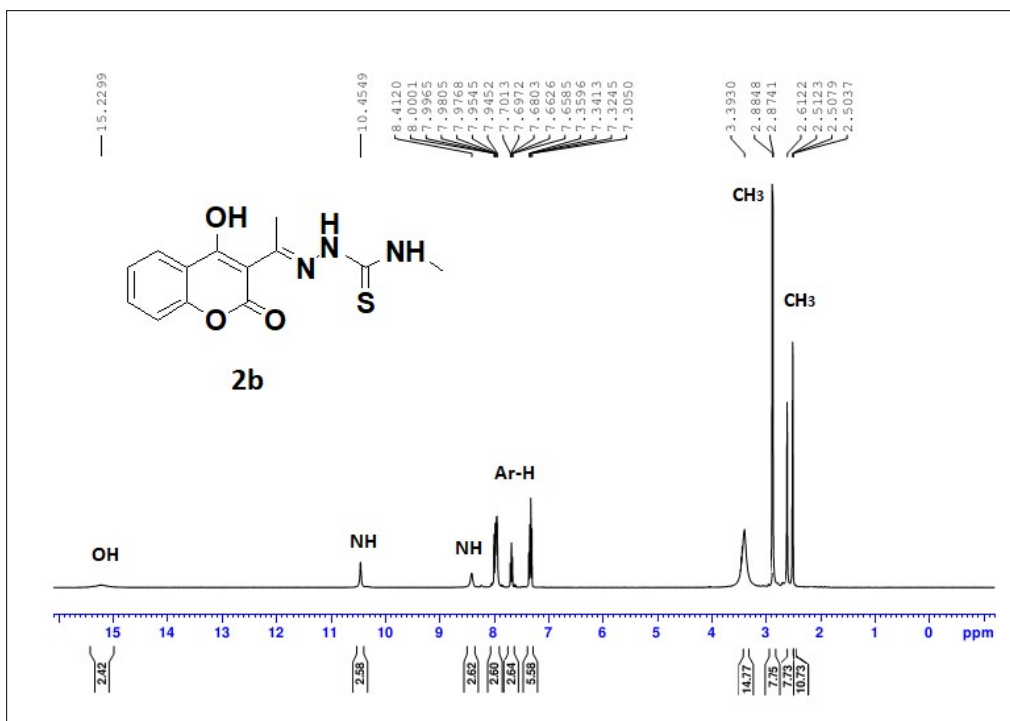

<sup>1</sup>H NMR spectrum of compound 2b

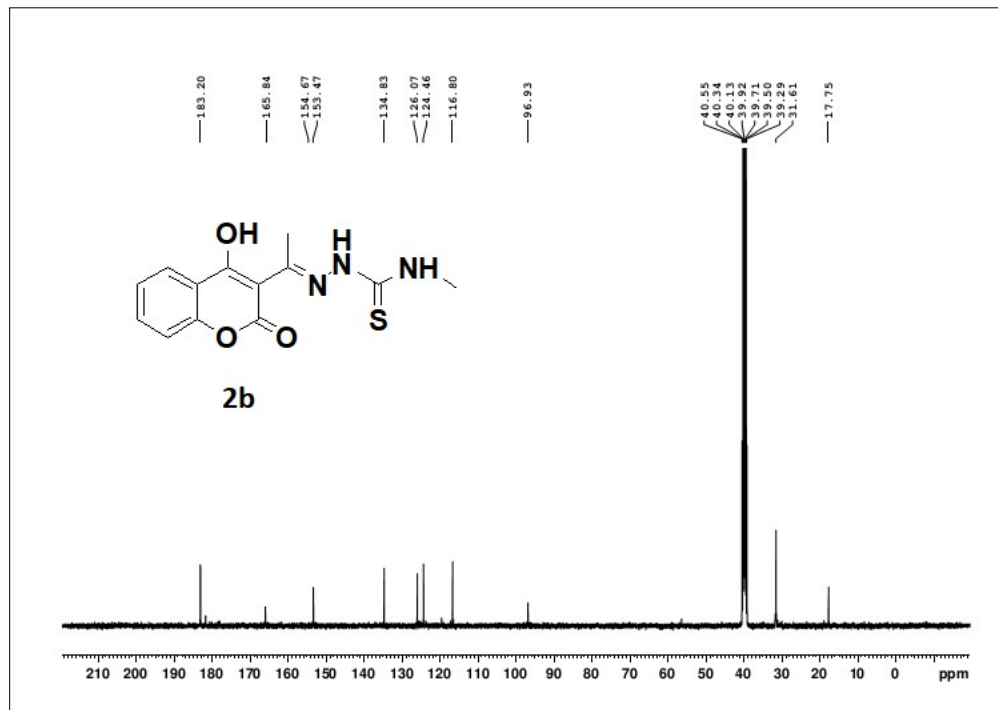

<sup>13</sup>C NMR spectrum of compound 2b

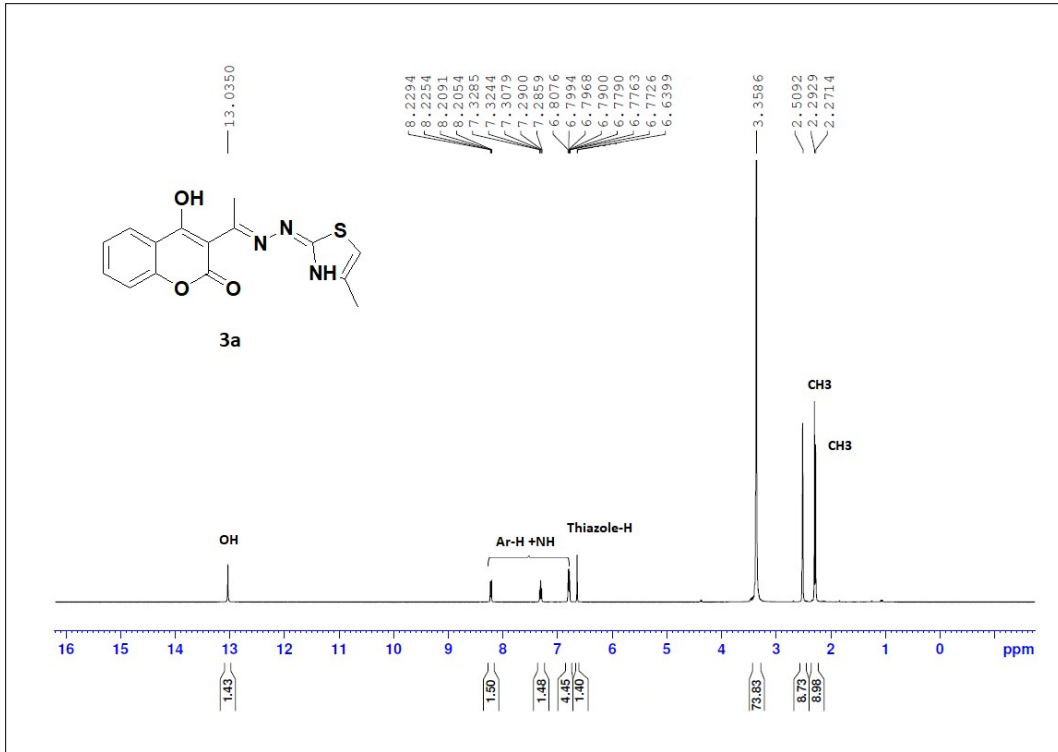

**<sup>1</sup>H NMR spectrum of compound 3a**

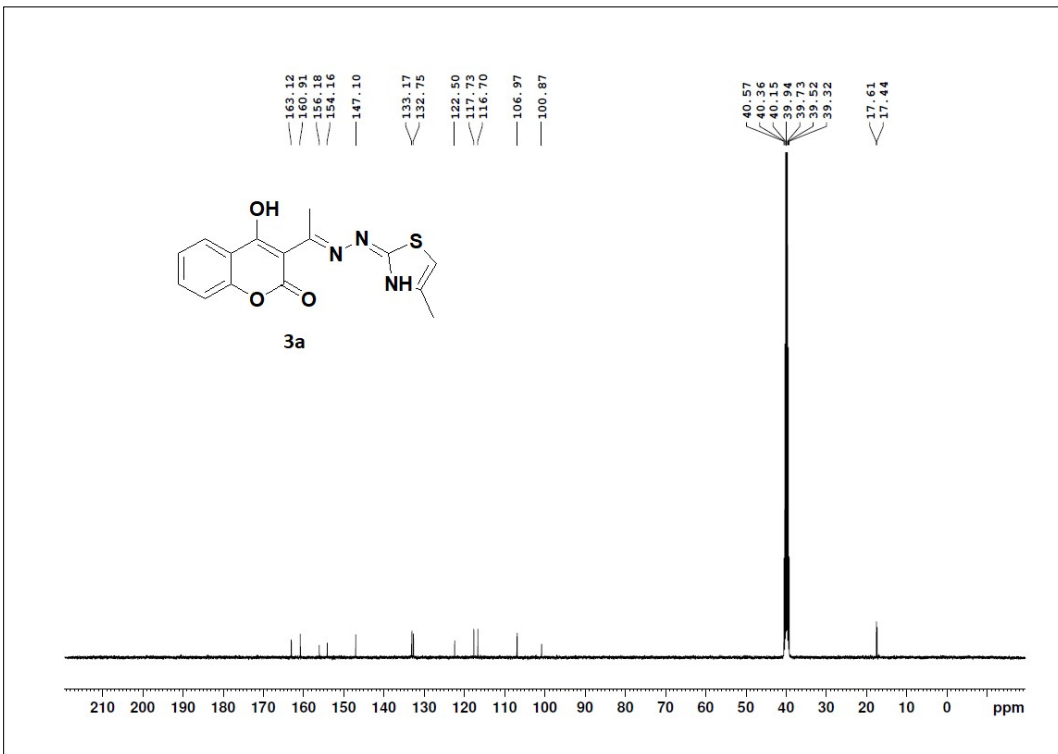

**<sup>13</sup>C NMR spectrum of compound 3a**

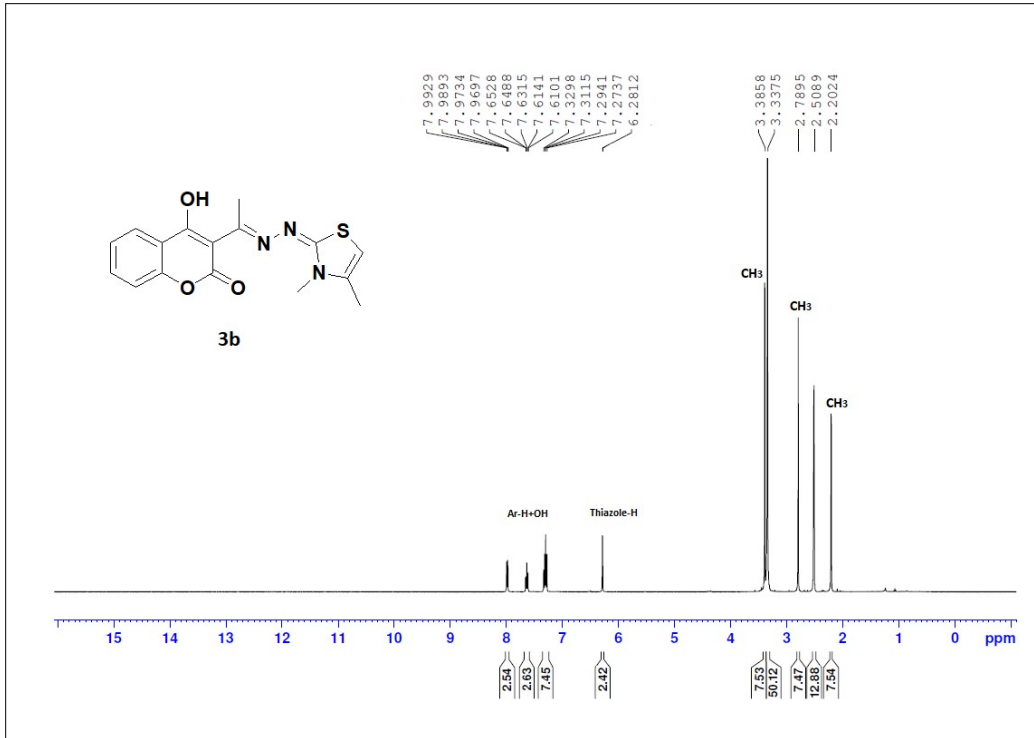

**<sup>1</sup>H NMR spectrum of compound 3b**

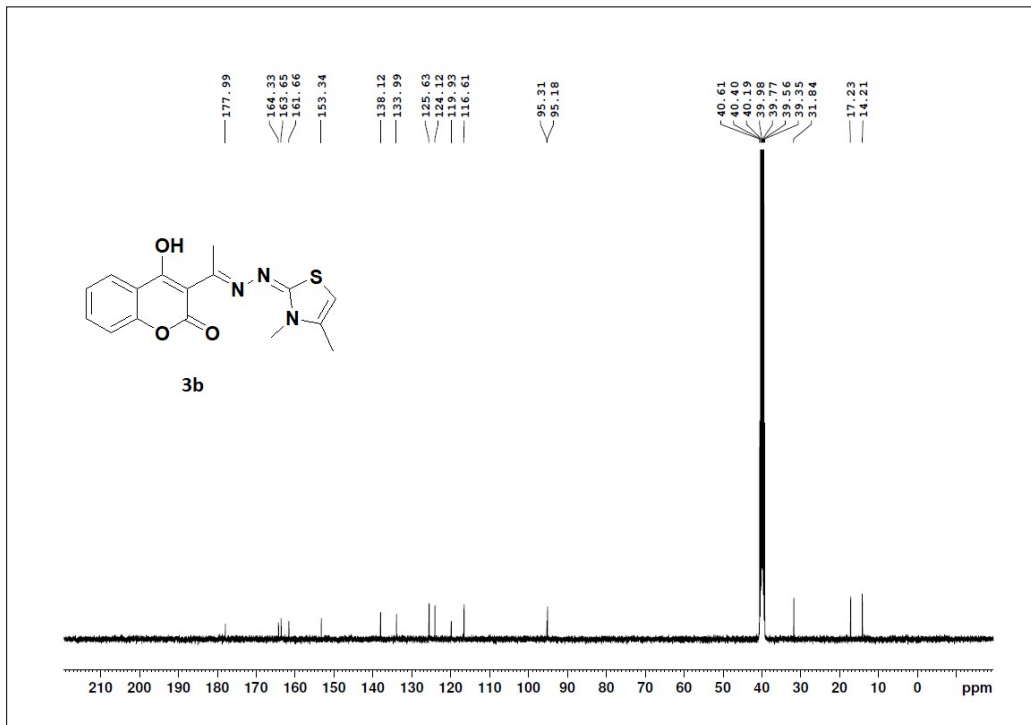

**<sup>13</sup>C NMR spectrum of compound 3b**

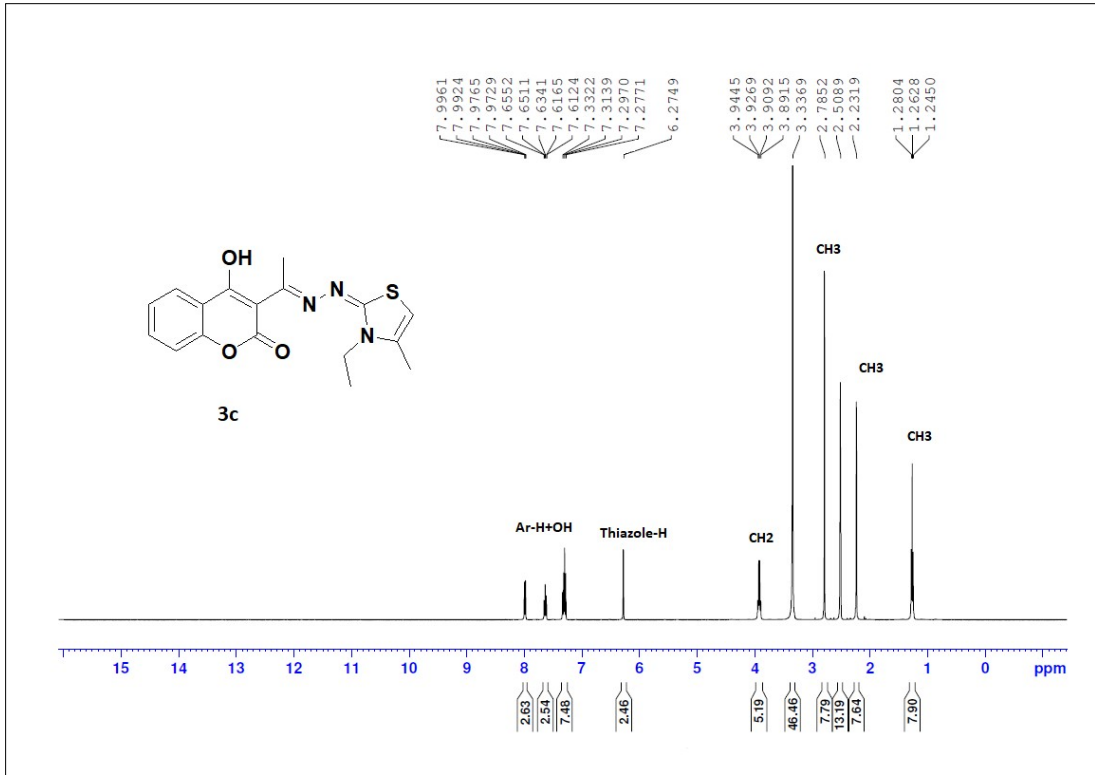

**<sup>1</sup>H NMR spectrum of compound 3c**

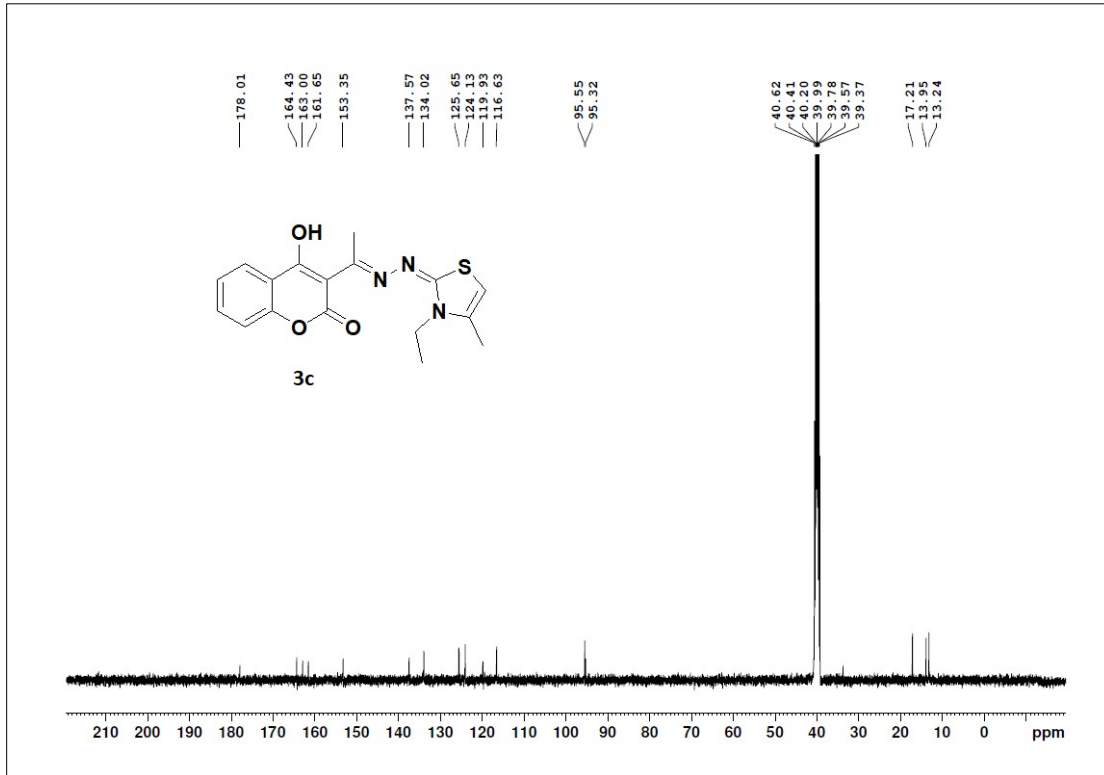

**<sup>13</sup>C NMR spectrum of compound 3c**

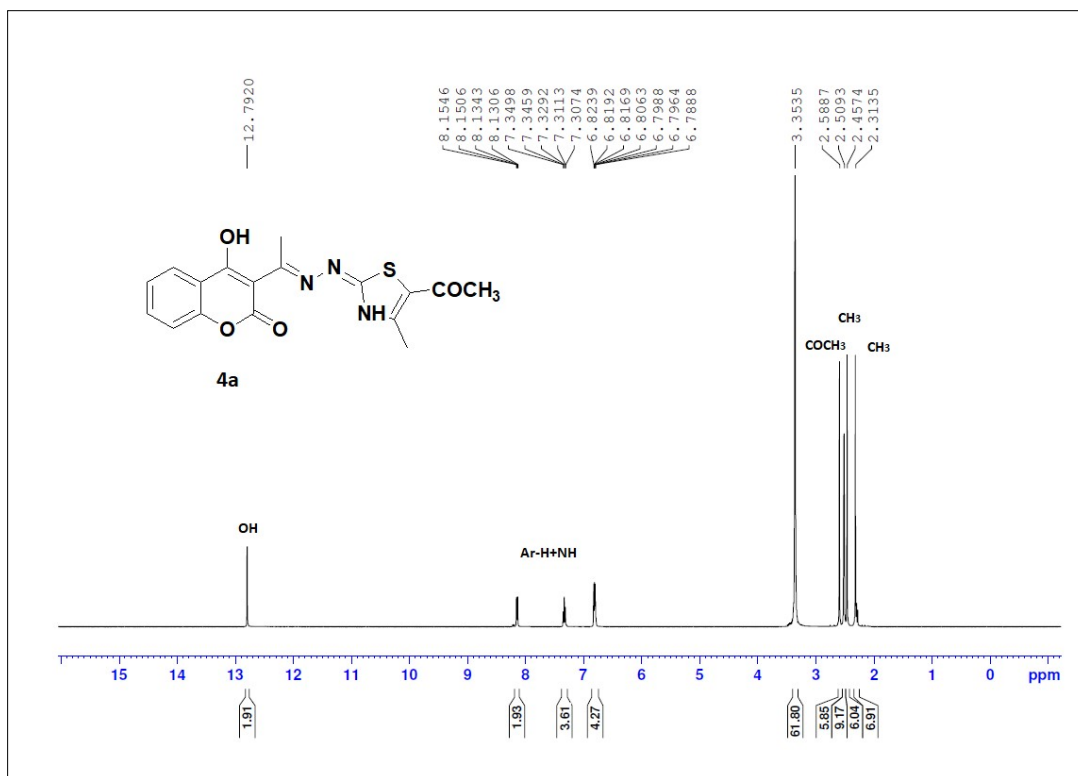

**<sup>1</sup>H NMR spectrum of compound 4a**

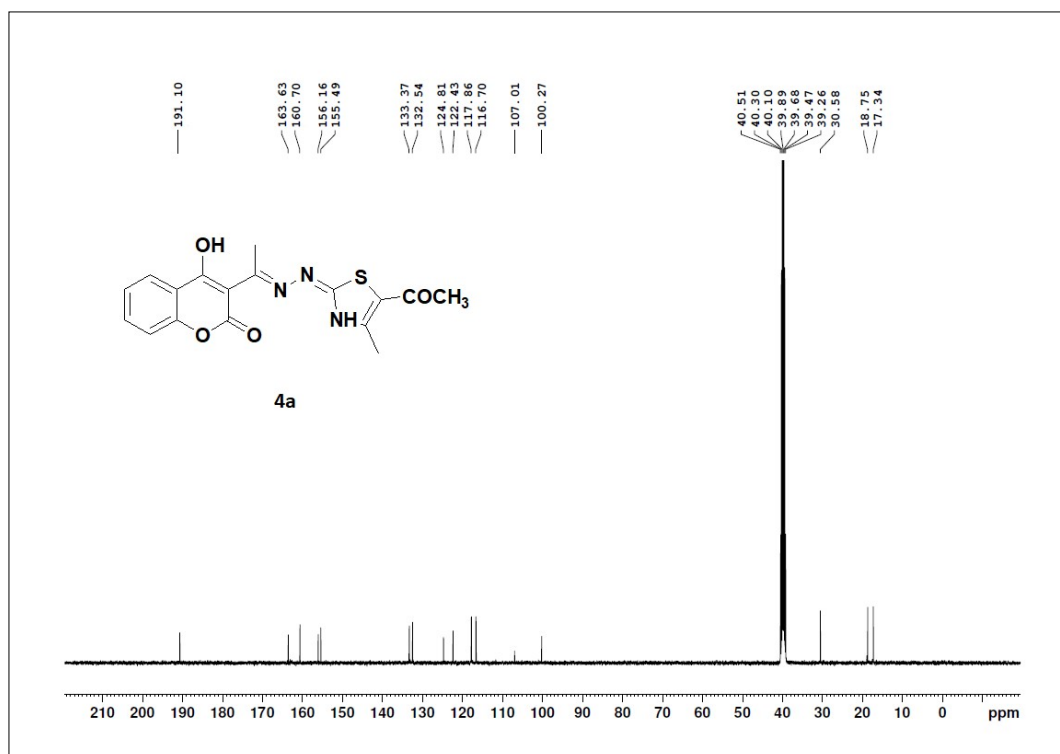

**<sup>13</sup>C NMR spectrum of compound 4a**

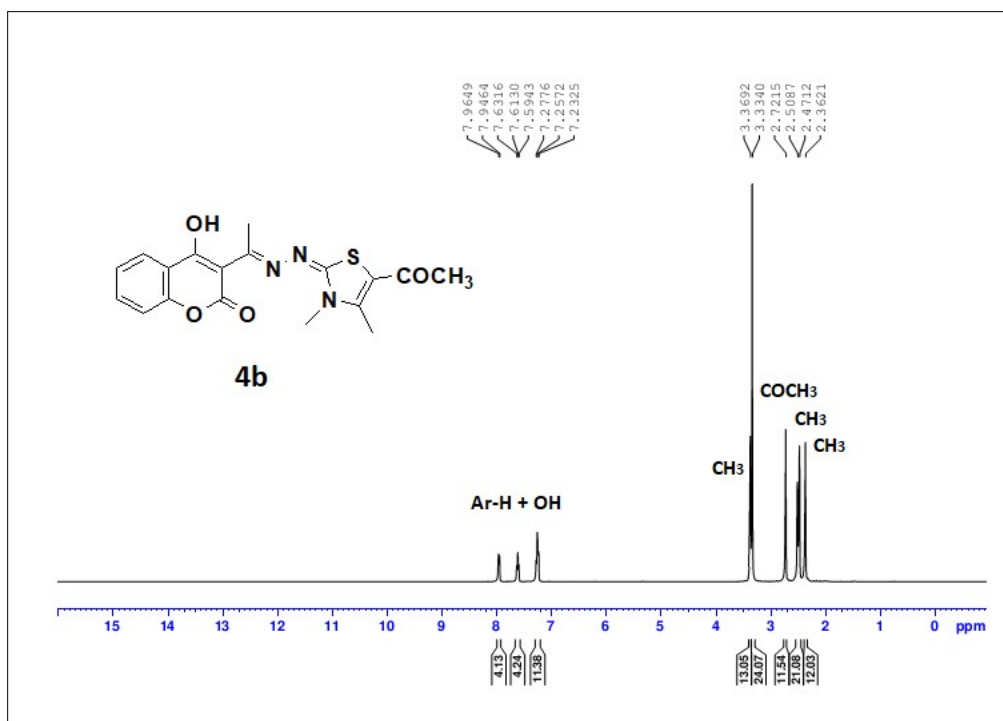

<sup>1</sup>H NMR spectrum of compound **4b**

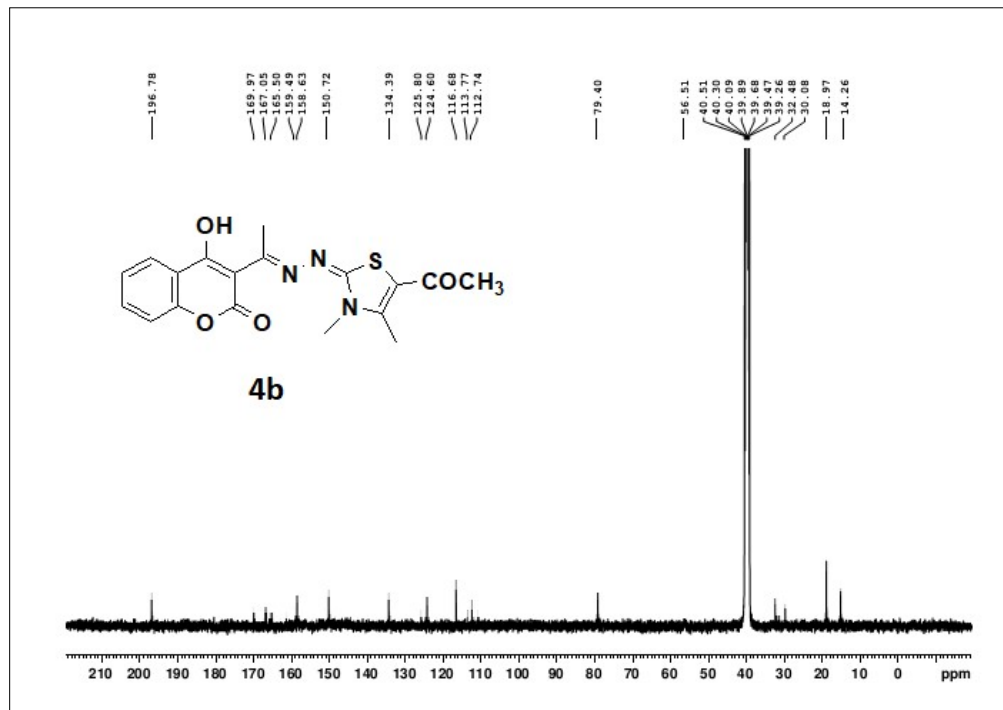

<sup>13</sup>C NMR spectrum of compound **4b**

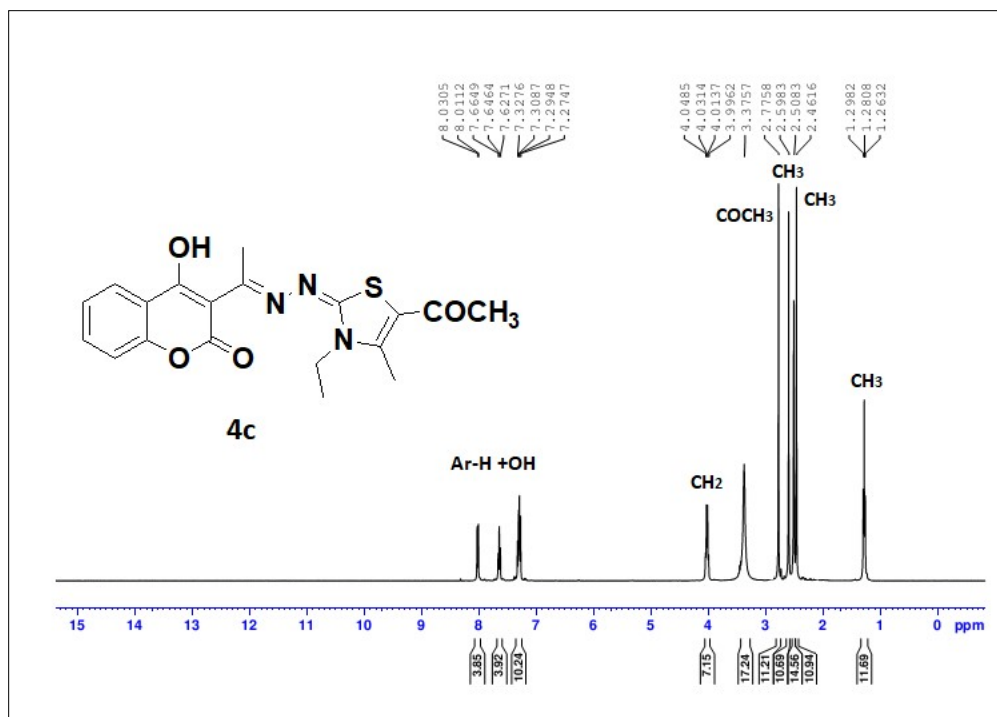

**<sup>1</sup>H NMR spectrum of compound 4c**

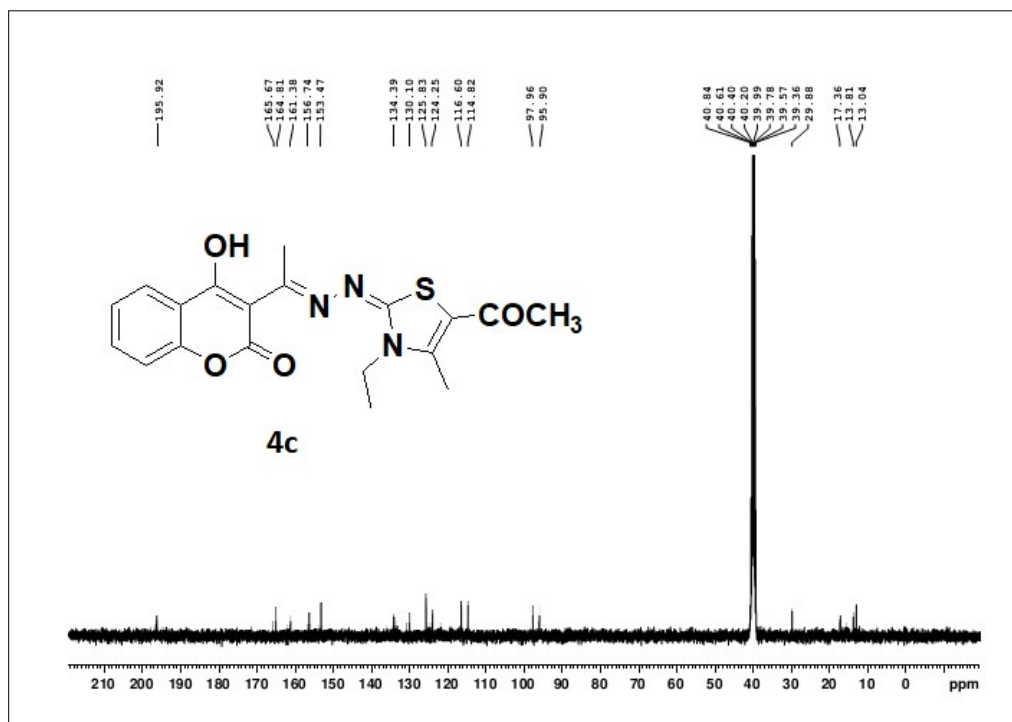

**<sup>13</sup>C NMR spectrum of compound 4c**



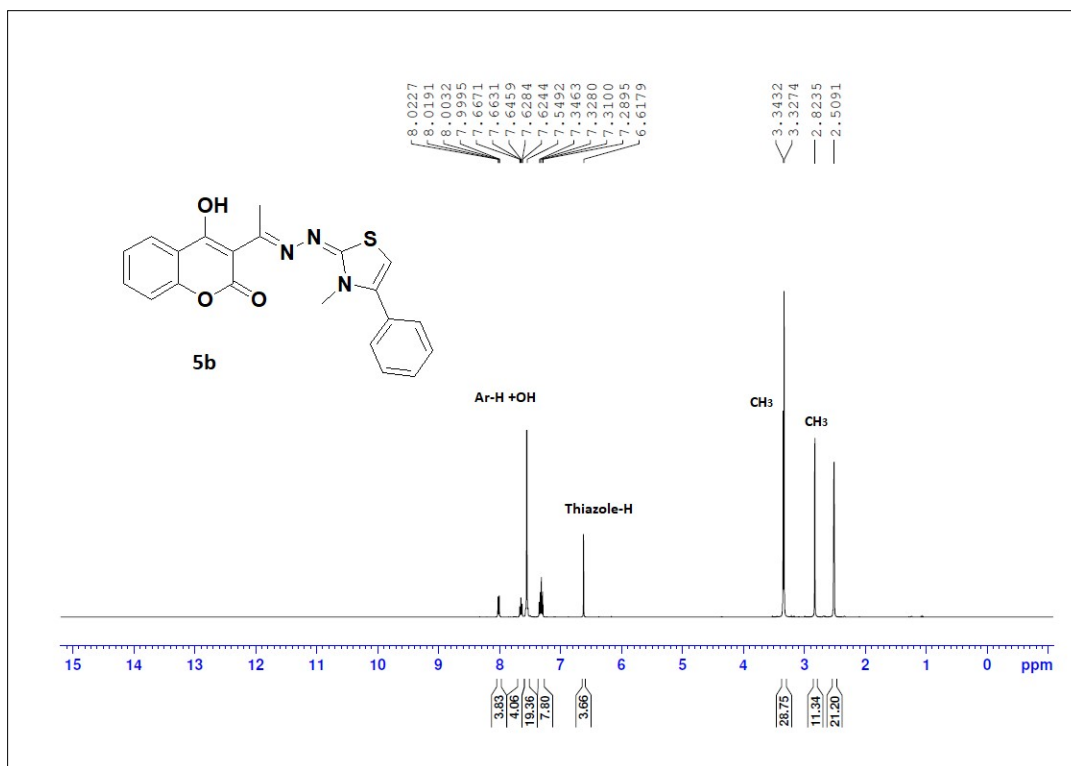

**<sup>1</sup>H NMR spectrum of compound 5b**

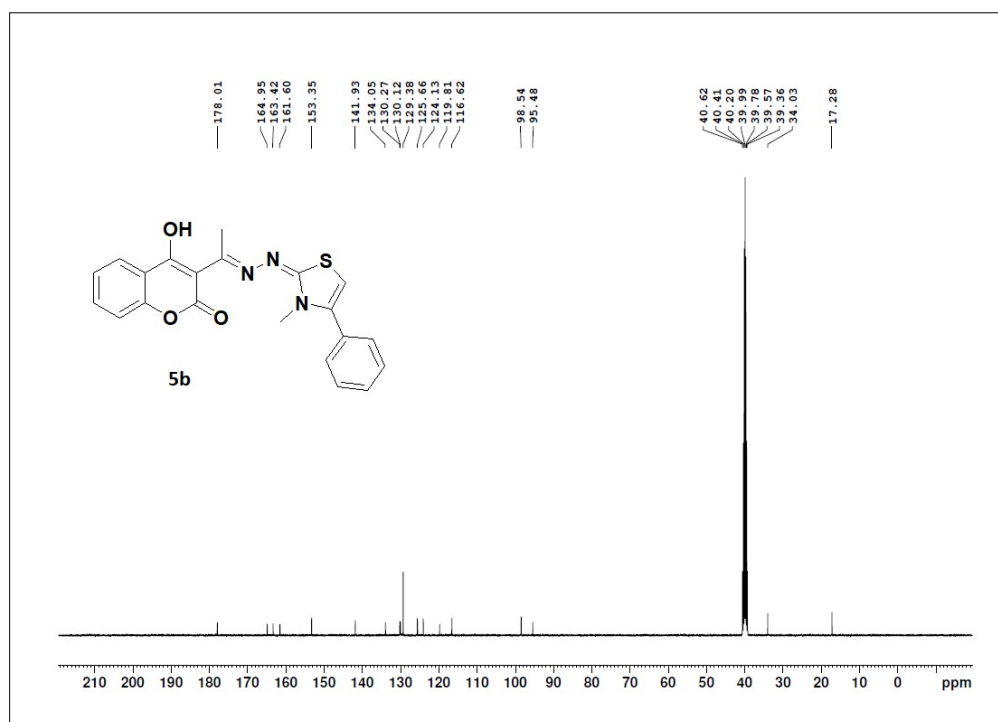

**<sup>13</sup>C NMR spectrum of compound 5b**

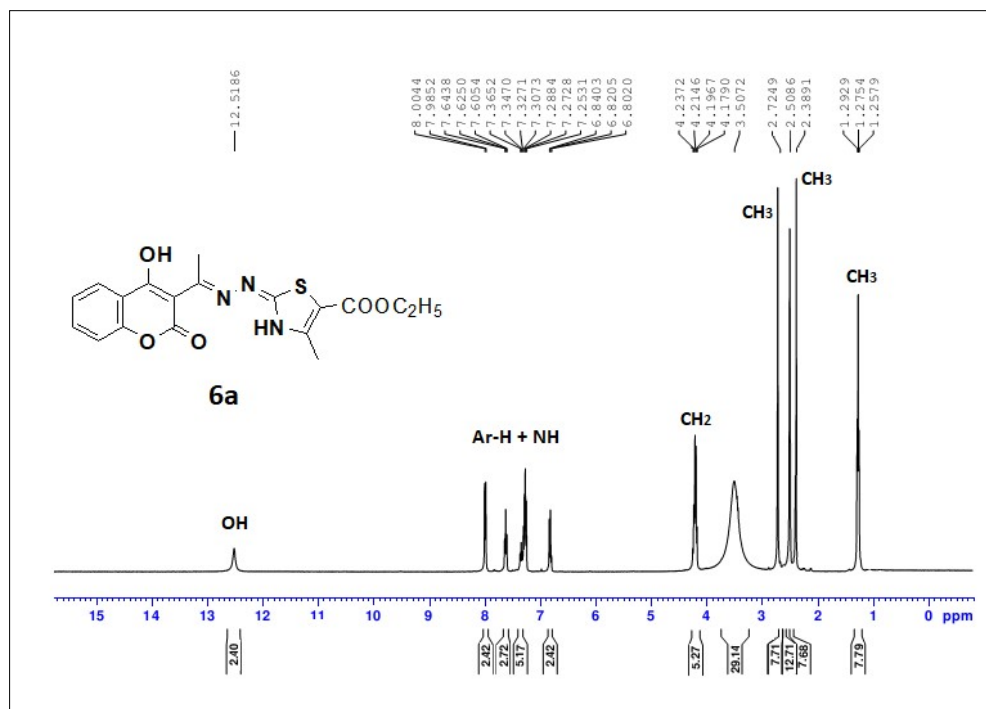

<sup>1</sup>H NMR spectrum of compound 6a

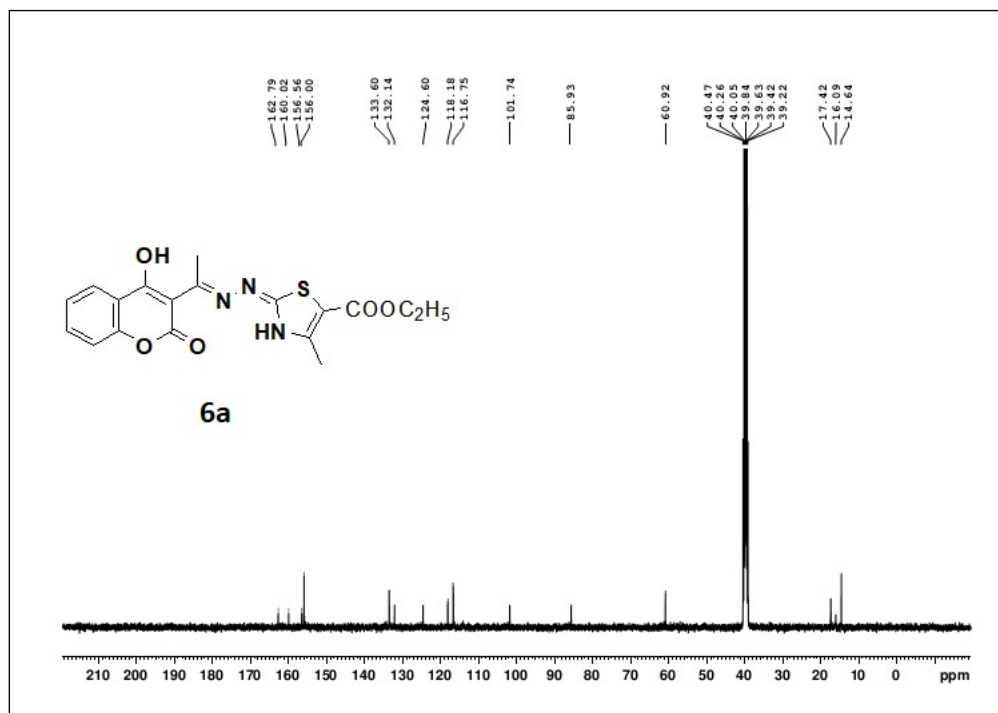

<sup>13</sup>C NMR spectrum of compound 6a

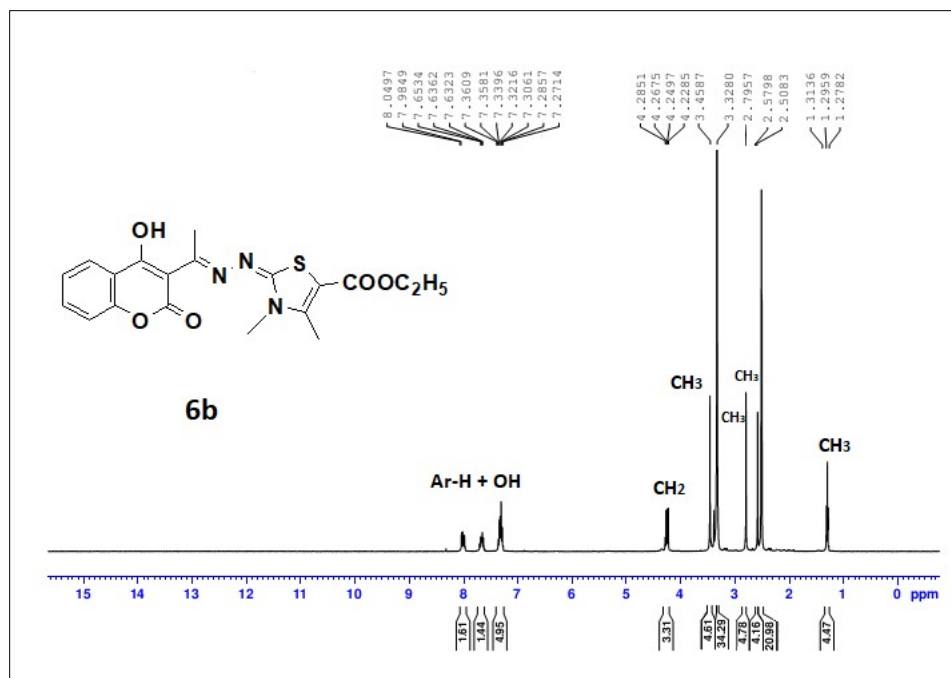

<sup>1</sup>H NMR spectrum of compound 6b

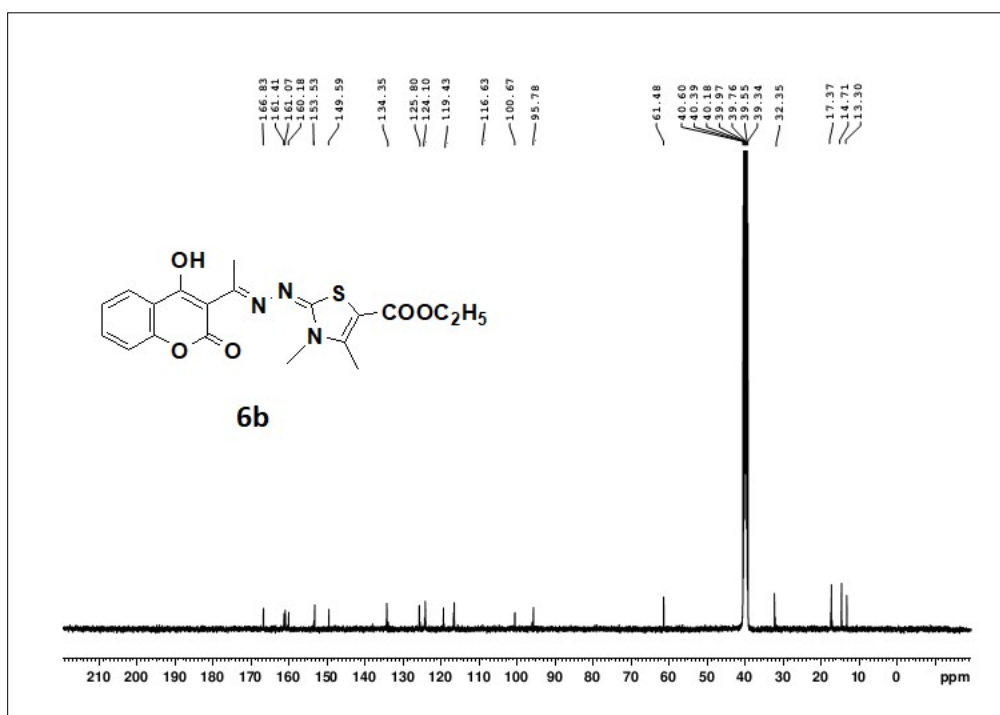

<sup>13</sup>C NMR spectrum of compound 6b

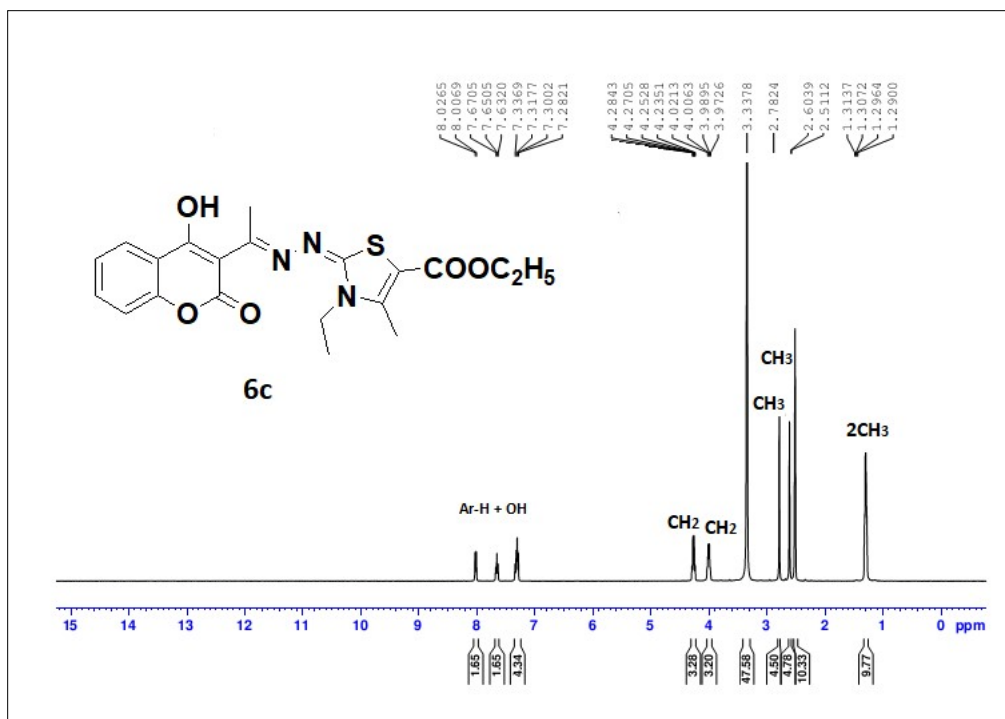

<sup>1</sup>H NMR spectrum of compound 6c

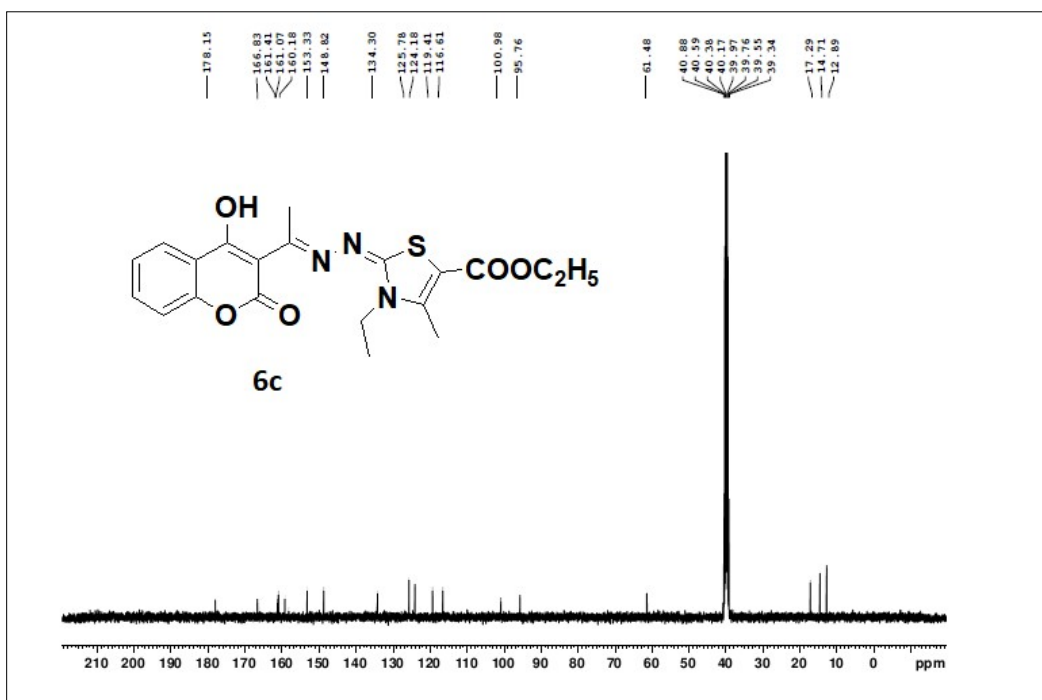

<sup>13</sup>C NMR spectrum of compound 6c

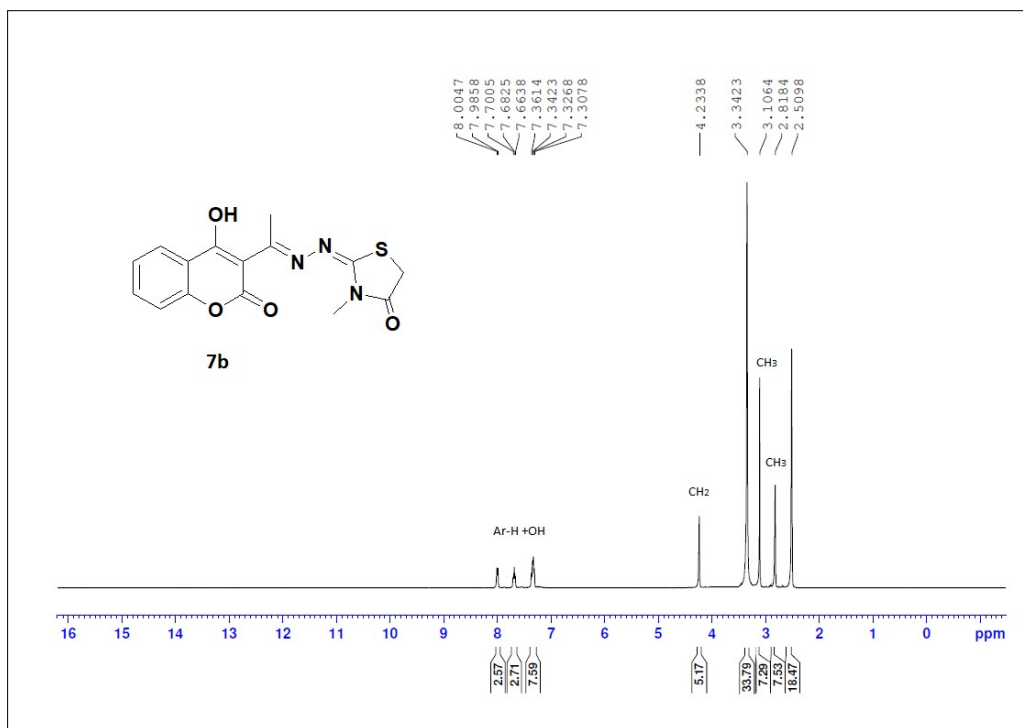

**<sup>1</sup>H NMR spectrum of compound 7b**

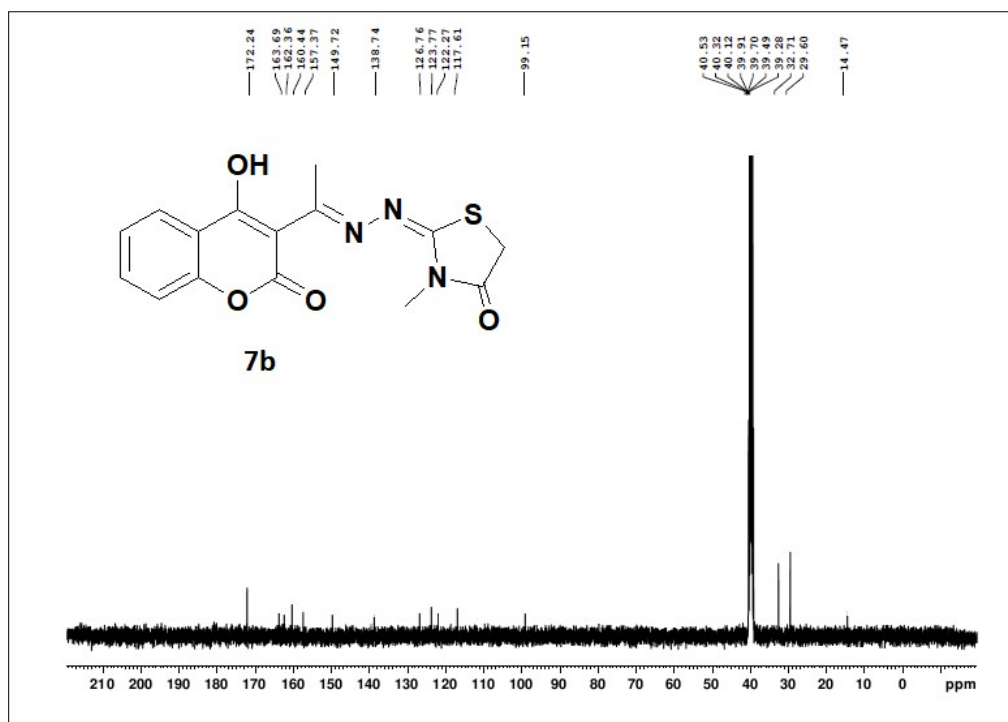

**<sup>13</sup>C NMR spectrum of compound 7b**

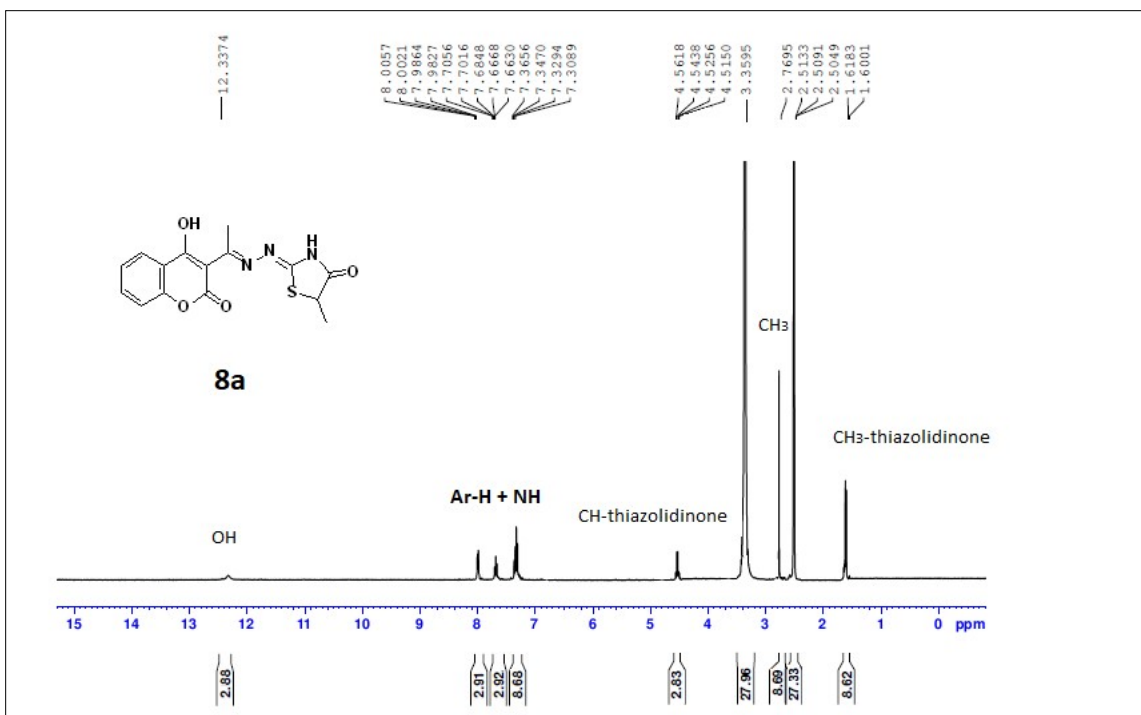

**<sup>1</sup>H NMR spectrum of compound 8a**

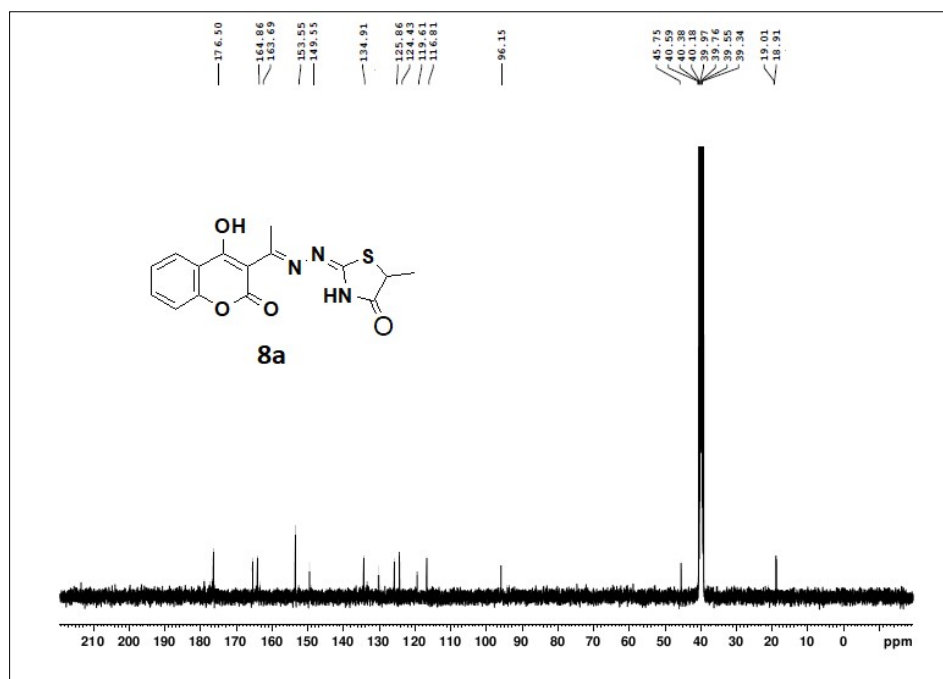

**<sup>13</sup>C NMR spectrum of compound 8a**

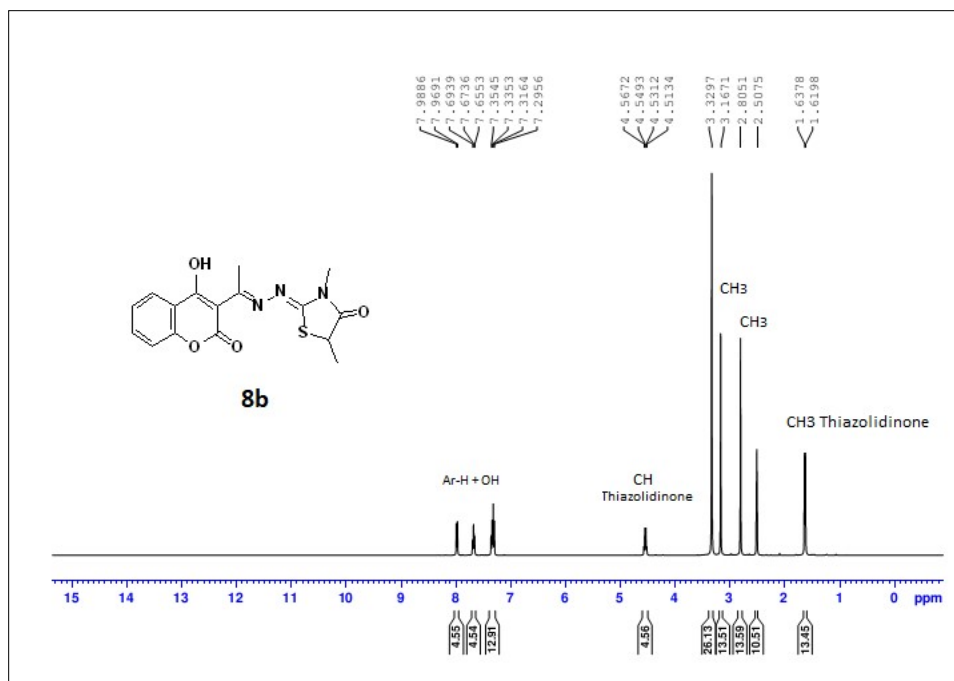

<sup>1</sup>H NMR spectrum of compound 8b

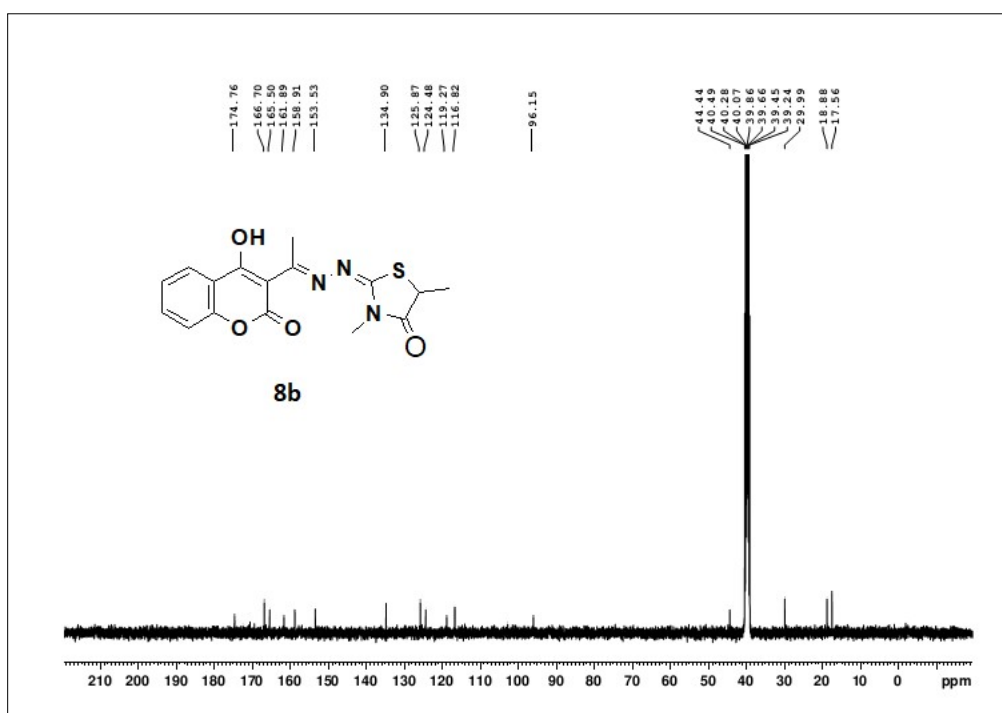

<sup>13</sup>C NMR spectrum of compound 8b

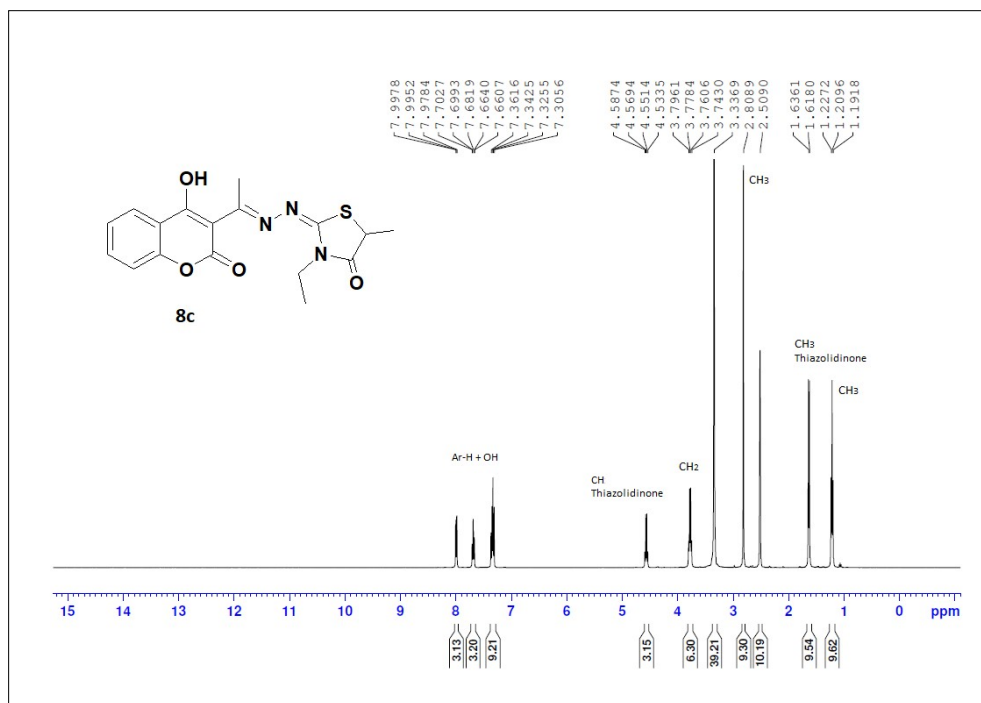

**<sup>1</sup>H NMR spectrum of compound 8c**

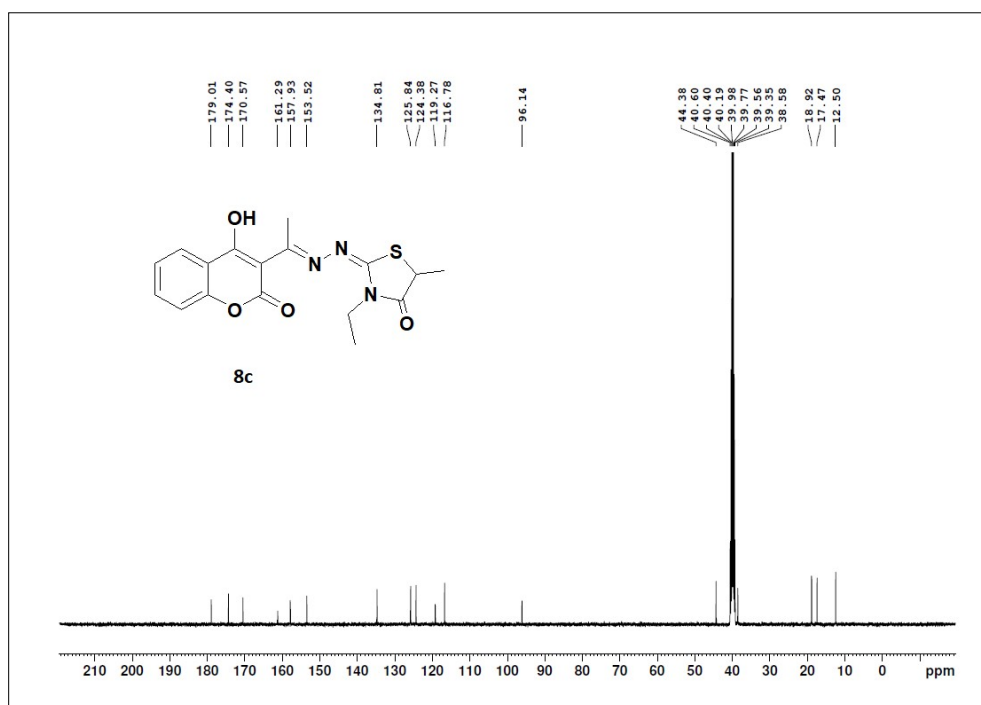

**<sup>13</sup>C NMR spectrum of compound 8c**



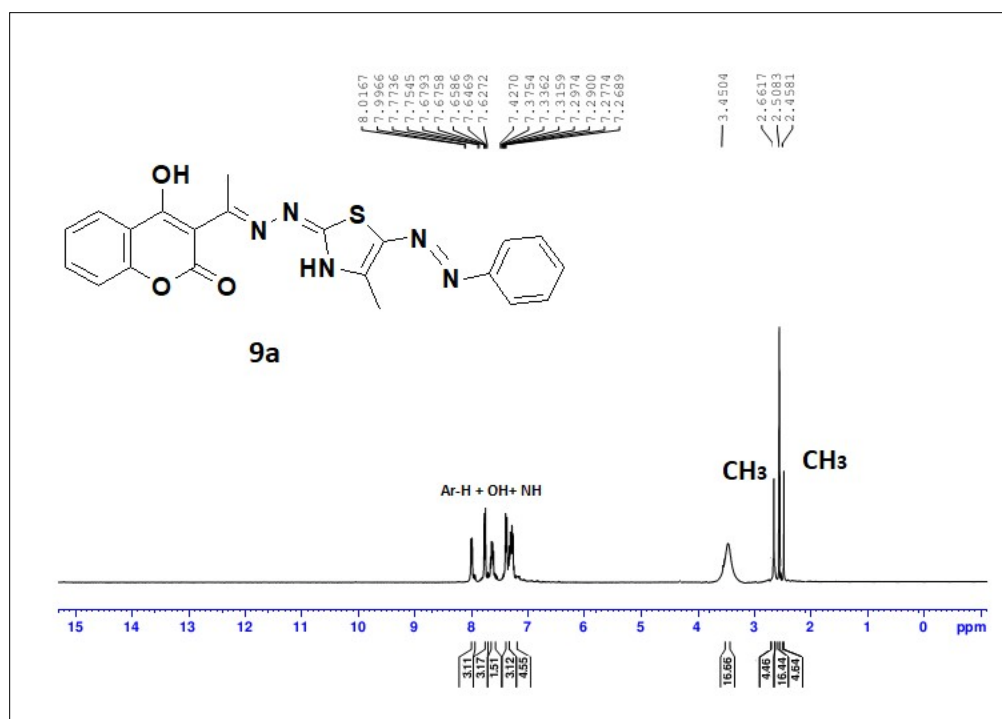

<sup>1</sup>H NMR spectrum of compound 9a

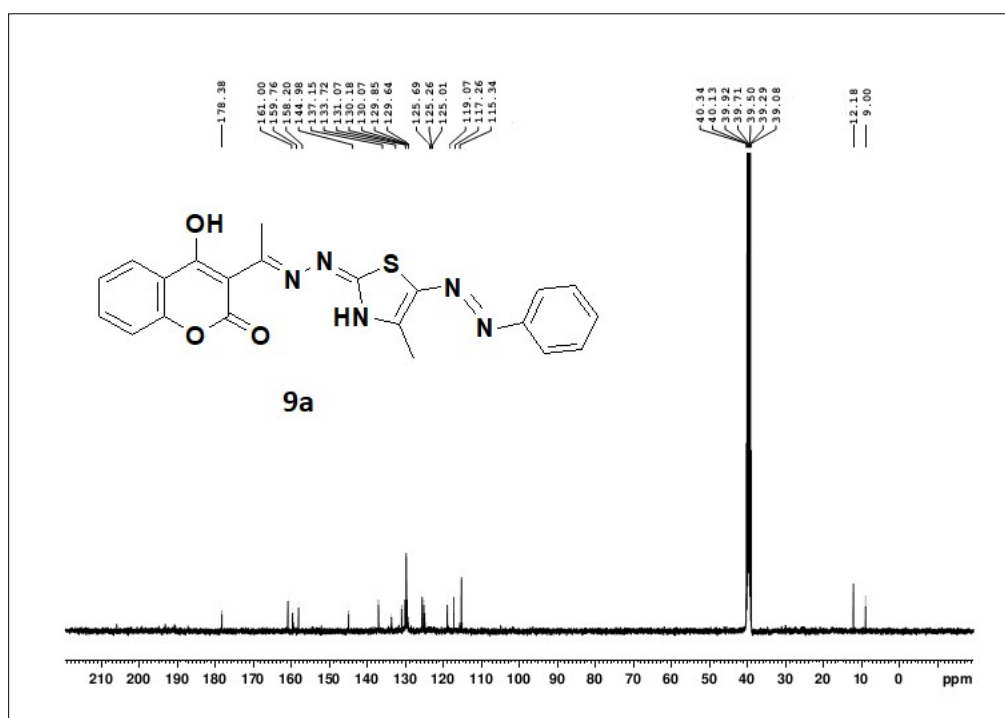

<sup>13</sup>C NMR spectrum of compound 9a

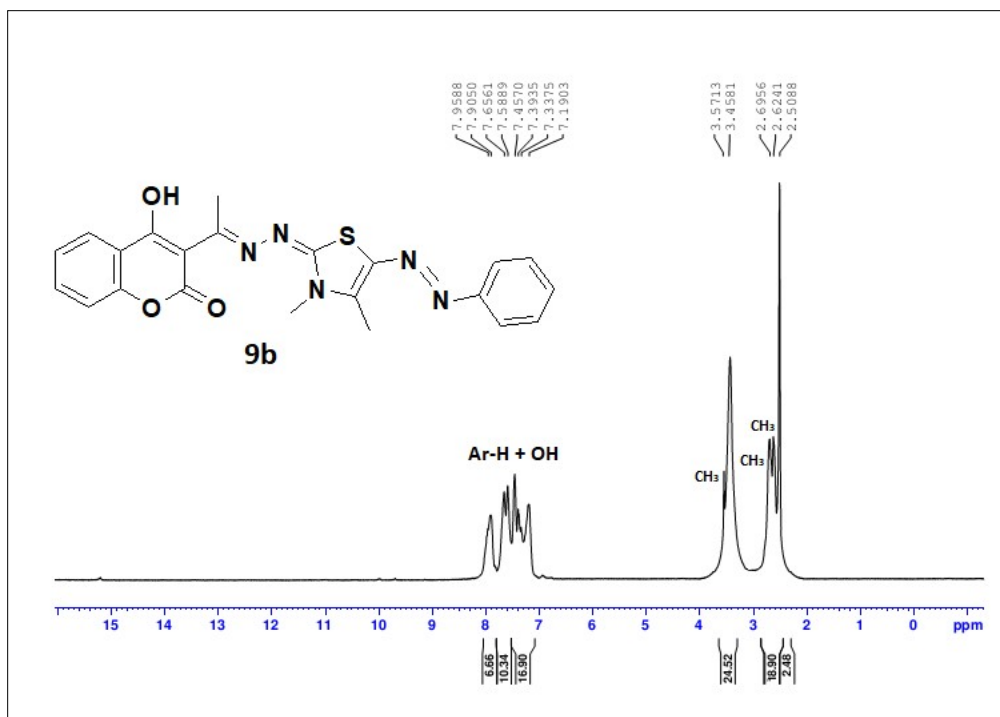

**<sup>1</sup>H NMR spectrum of compound 9b**

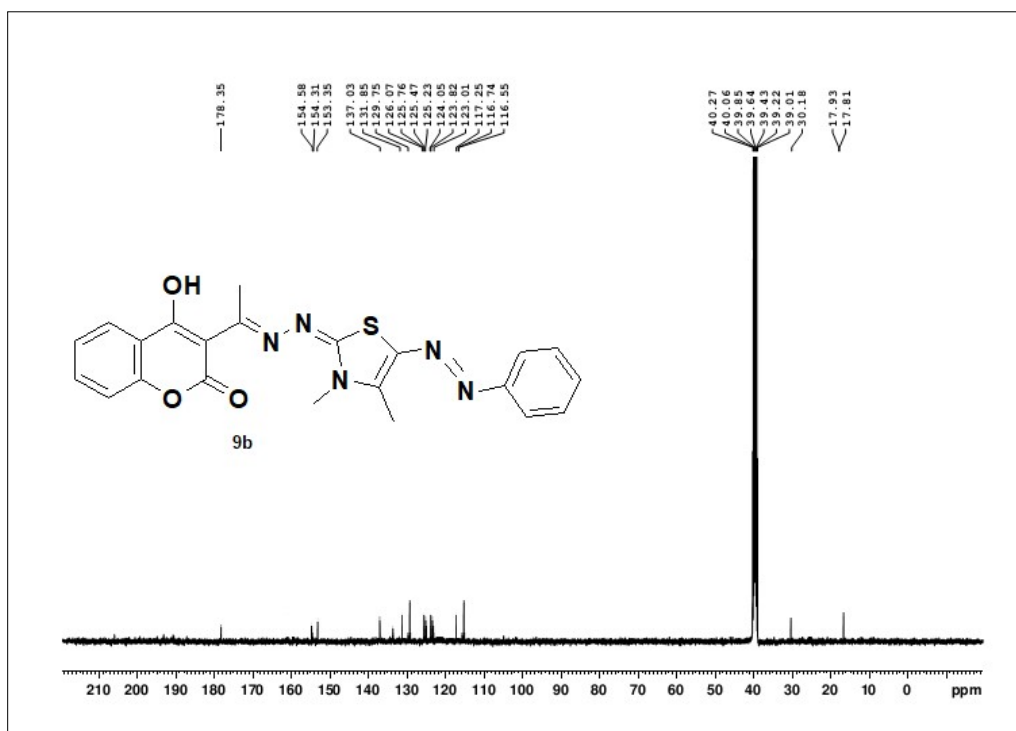

**<sup>13</sup>C NMR spectrum of compound 9b**

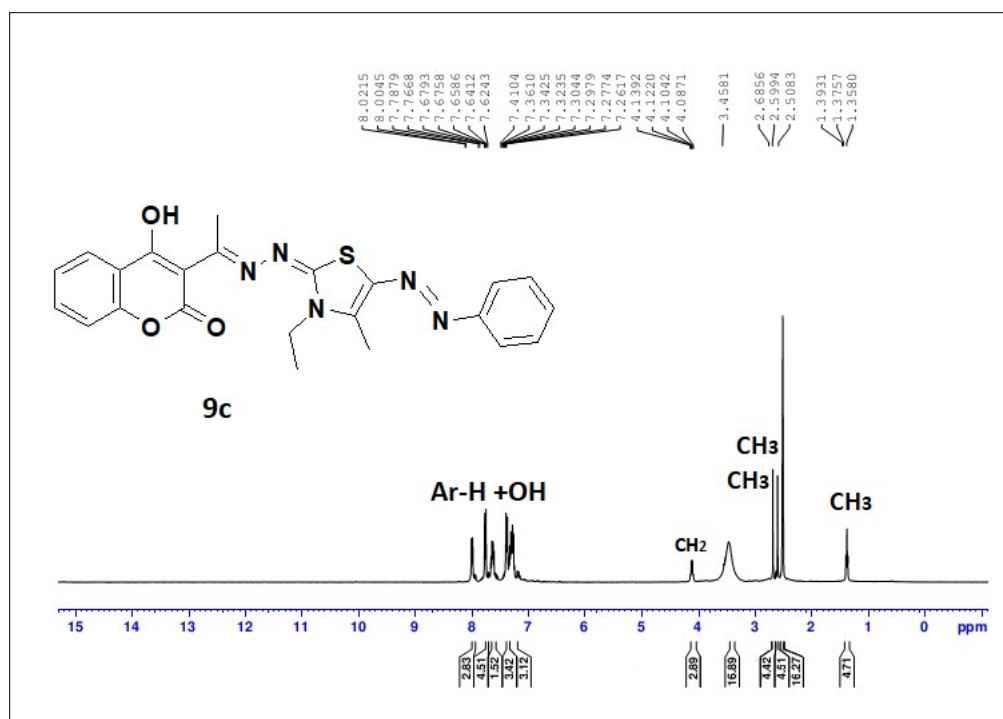

**<sup>1</sup>H NMR spectrum of compound 9c**

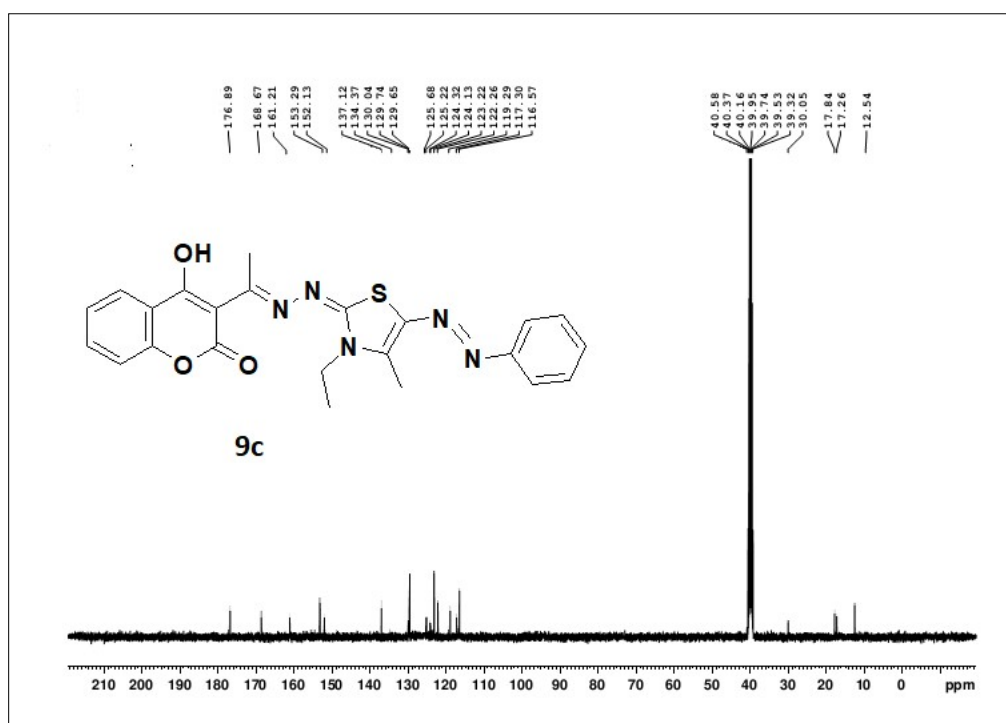

**<sup>13</sup>C NMR spectrum of compound 9c**

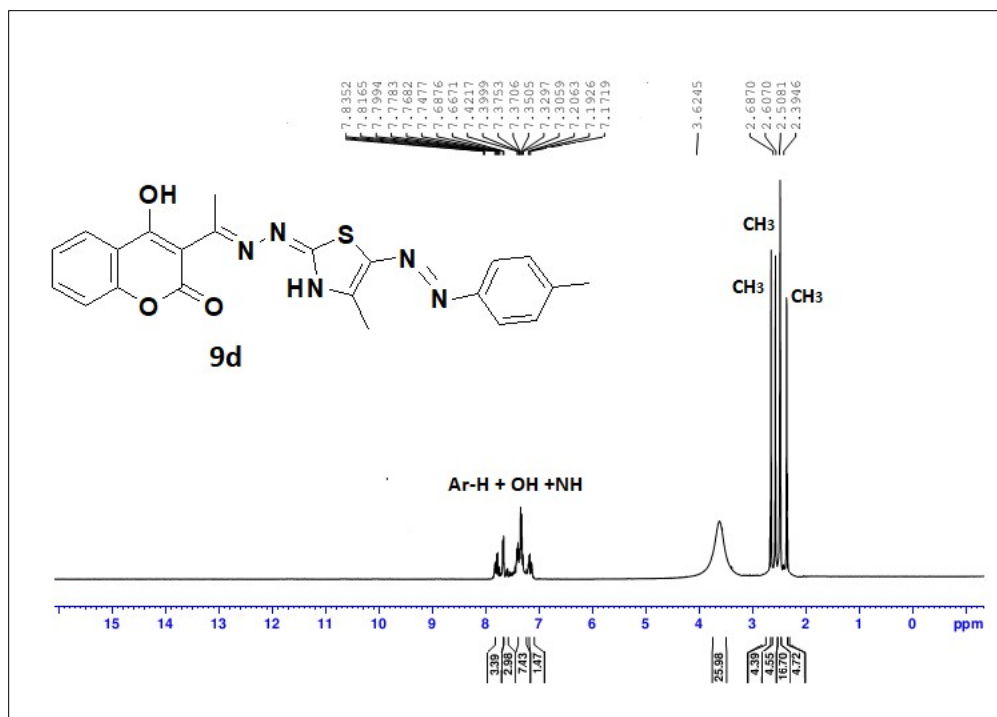

**<sup>1</sup>H NMR spectrum of compound 9d**

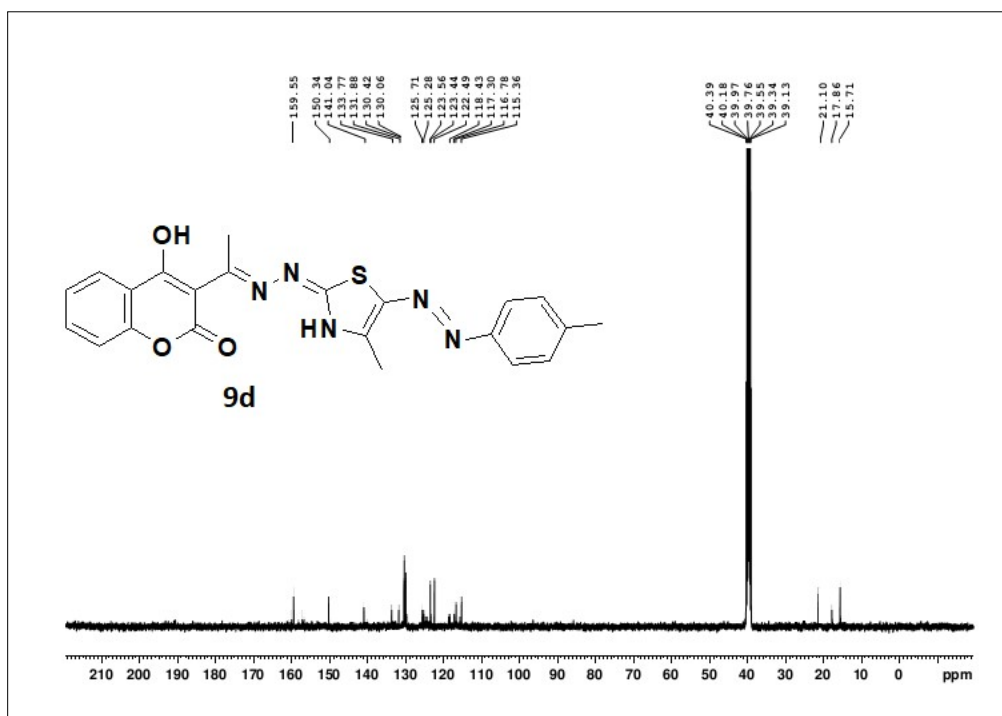

**<sup>13</sup>C NMR spectrum of compound 9d**

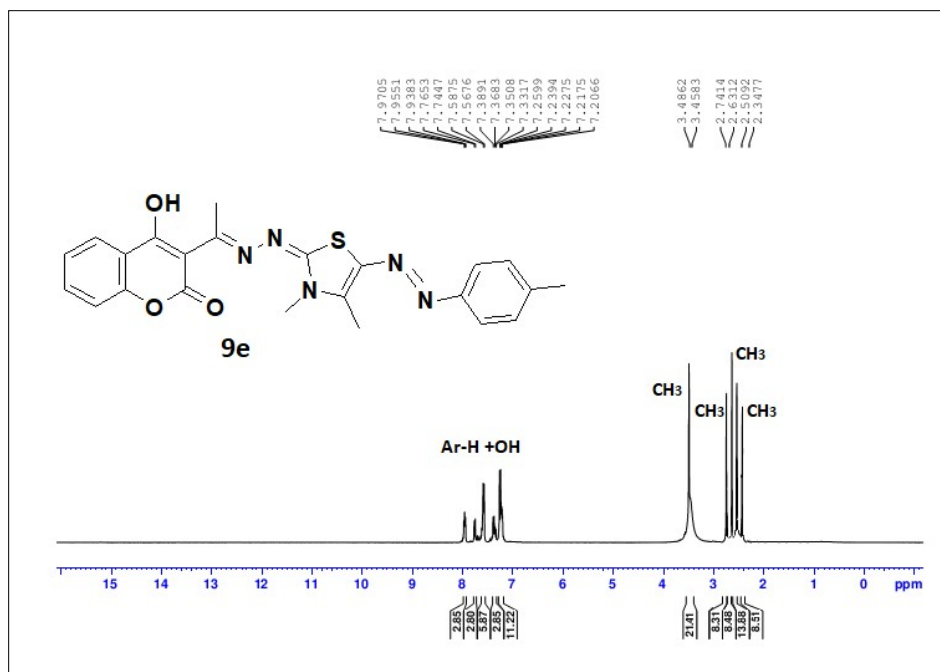

**<sup>1</sup>H NMR spectrum of compound 9e**

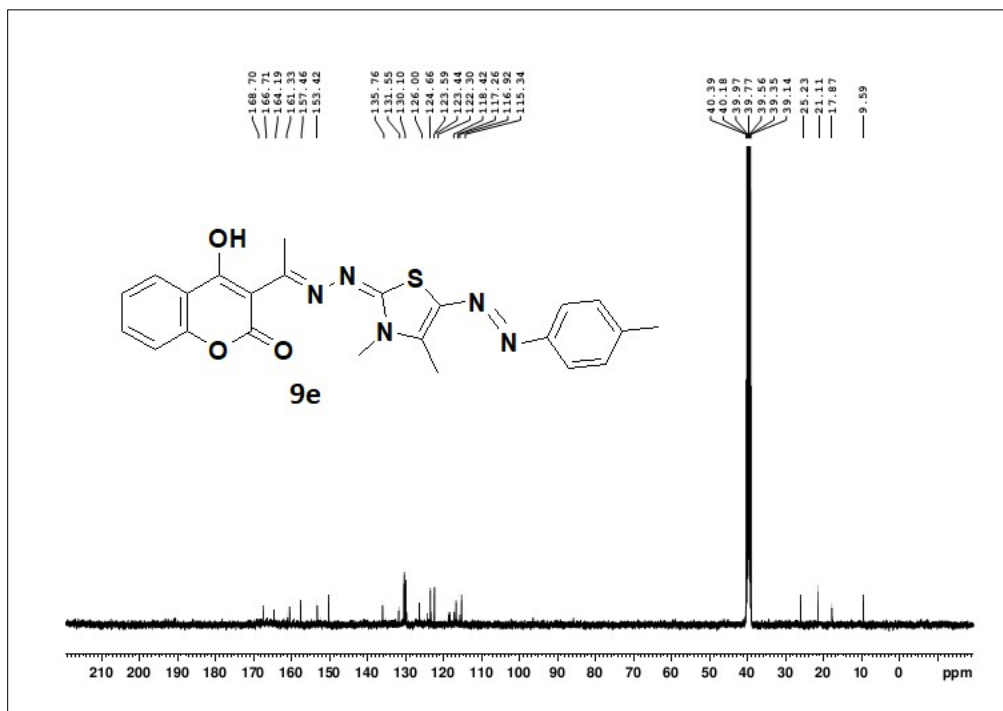

**<sup>13</sup>C NMR spectrum of compound 9e**

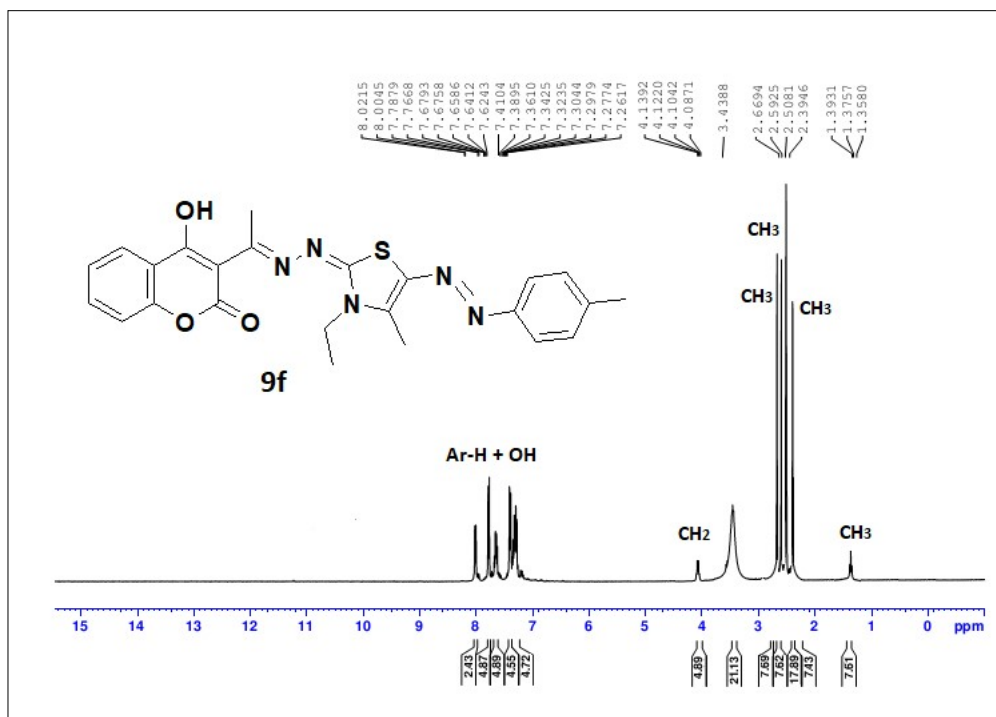

**<sup>1</sup>H NMR spectrum of compound 9f**

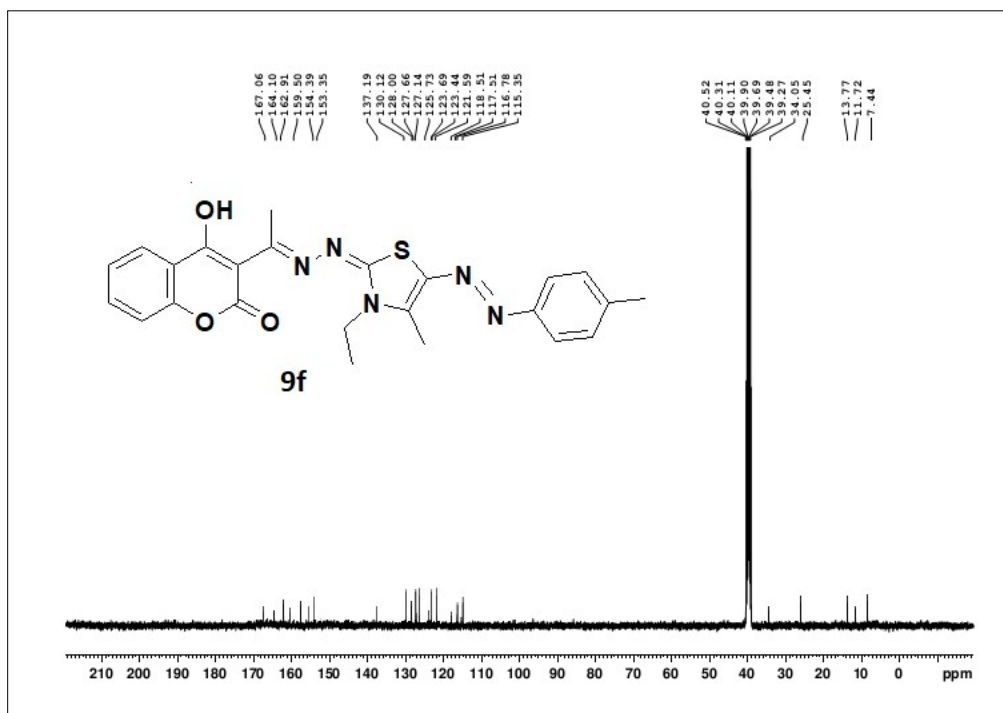

**<sup>13</sup>C NMR spectrum of compound 9f**

**The cytotoxic IC<sub>50</sub> values and selectivity index (S.I) of the synthesized compounds.**

| Compound           | IC <sub>50</sub> (μM) ± SD |                     |                     |            |
|--------------------|----------------------------|---------------------|---------------------|------------|
|                    | MCF-7 (S.I.)               | HCT-116 (S.I.)      | HepG-2 (S.I.)       | BJ-1 cells |
| <b>2a</b>          | 8.1 ± 1.1 (> 12.35)        | 17.8 ± 2.1(> 5.62)  | 61.4 ± 5.1 (> 1.63) | > 100      |
| <b>2b</b>          | 13.6 ± 1.5 (> 7.35)        | 7.2 ± 0.6 (> 13.89) | 48.1 ± 3.9 (> 2.08) | > 100      |
| <b>2c</b>          | 22.7 ± 2.6 (> 4.41)        | 17.8 ± 1.8 (>5.62)  | 46.4 ± 3.6 (> 2.16) | > 100      |
| <b>3a</b>          | 34.5 ± 3.6 (> 2.90)        | 32.6 ± 3.1 (> 3.07) | 42.5 ± 4.1 (> 2.35) | > 100      |
| <b>3b</b>          | 34.9 ± 3.1 (> 2.87)        | 27.2 ± 2.9 (> 3.68) | 46.1 ± 3.7 (> 2.17) | > 100      |
| <b>3c</b>          | 36.5 ± 4.2 (> 2.74)        | 36.3 ± 3.5 (> 2.75) | 68.2 ± 5.6 (> 1.47) | > 100      |
| <b>4a</b>          | 25.6 ± 3.1 (> 3.91)        | 31.4 ± 3.1(> 3.18)  | 48.8 ± 3.1 (> 2.05) | > 100      |
| <b>4b</b>          | 32.7 ± 3.5 (> 3.06)        | 24.3 ± 2.7 (> 4.12) | 57.1 ± 4.3 (> 1.75) | > 100      |
| <b>4c</b>          | 33.7 ± 3.2 (> 2.97)        | 38.9 ± 3.2 (> 2.57) | 62.5 ± 3.9 (> 1.6)  | > 100      |
| <b>5a</b>          | 34.8 ± 4.6 (> 2.87)        | 31.8 ± 3.2 (> 3.14) | 47.6 ± 4.1 (> 2.10) | > 100      |
| <b>5b</b>          | 34.6 ± 2.9 (> 2.89)        | 42.4 ± 4.1 (> 2.36) | 66.4 ± 5.6 (> 1.51) | > 100      |
| <b>5c</b>          | 25.9 ± 2.3 (> 3.86)        | 9.9 ± 0.9 (> 10.10) | 86.9 ± 5.9 (> 1.15) | > 100      |
| <b>6a</b>          | 6.4 ± 0.5 (> 15.63)        | 20.4 ± 1.9 (> 4.90) | 57.2 ± 4.3 (> 1.75) | > 100      |
| <b>6b</b>          | 11.2 ± 1.1 (> 8.93)        | 5.9 ± 0.7 (> 16.95) | 41.4 ± 2.9 (> 2.42) | > 100      |
| <b>6c</b>          | 20.7 ± 2.1 (> 4.83)        | 24.7 ±1.6 (> 4.05)  | 45.1 ± 4.1 (> 2.22) | > 100      |
| <b>7a</b>          | 26.3 ± 4.1 (> 3.80)        | 9.5 ± 1.1 (> 10.53) | 97.6 ± 8.2 (> 1.02) | > 100      |
| <b>7b</b>          | 32.8 ± 3.5 (> 3.05)        | 41.2 ± 3.9 (> 2.43) | 65.7 ± 5.1 (> 1.52) | > 100      |
| <b>7c</b>          | 24.2 ± 3.7 (> 4.13)        | 10.8 ± 1.1 (> 9.26) | 93.8 ± 6.1(> 1.07)  | > 100      |
| <b>8a</b>          | 27.4 ± 1.9 (> 3.65)        | 38.3 ± 4.2 (> 2.61) | 42.4 ± 3.5 (> 2.36) | > 100      |
| <b>8b</b>          | 26.1 ± 3.5 (> 3.83)        | 44.8 ± 4.5 (> 2.23) | 67.2 ± 4.9 (> 1.49) | > 100      |
| <b>8c</b>          | 7.4 ± 0.9 (> 13.5)         | 44.9 ± 4.3 (> 2.23) | 80.2 ± 5.9 (> 1.25) | > 100      |
| <b>9a</b>          | 33.4 ± 2.8 (> 2.99)        | 33.9 ± 2.8 (> 2.95) | 71.2 ± 5.1 (> 1.40) | > 100      |
| <b>9b</b>          | 32.3 ± 3.5 (>3.09)         | 37.9 ± 2.5 (> 2.64) | 64.1 ± 5.5 (> 1.56) | > 100      |
| <b>9c</b>          | 32.8 ± 2.8 (> 3.05)        | 47.2 ± 4.5 (> 2.12) | 60.9 ± 4.8 (> 1.64) | > 100      |
| <b>9d</b>          | 26.3 ± 2.5 (> 3.80)        | 45.6 ± 4.2 (> 2.19) | 57.2 ± 4.6 (> 1.75) | > 100      |
| <b>9e</b>          | 23.3 ± 1.9 (> 4.29)        | 55.2 ± 5.1 (> 1.81) | 74.4 ± 5.9 (> 1.34) | > 100      |
| <b>9f</b>          | 17.8 ± 1.1 (> 5.62)        | 40.1 ±4.7 (> 2.49)  | 82.1 ± 6.1(> 1.22)  | > 100      |
| <b>Doxorubicin</b> | 16.7 ± 1.5                 | 21.8 ± 2.9          | 63.2 ± 5.8          |            |
